# Supplementary material for: Deep learning-based image analysis of eyelid morphology in thyroid-associated ophthalmopathy
Source: PubMed Central journal article supplement — Quant Imaging Med Surg. 2023 Jan 3;13(3):1592–604. doi: 10.21037/qims-22-551 (PMC10006102; doi:10.21037/qims-22-551), 2023-01-03
Supplement: qims-13-03-1592-supplementary.pdf [file qims-13-03-1592-supplementary.pdf]

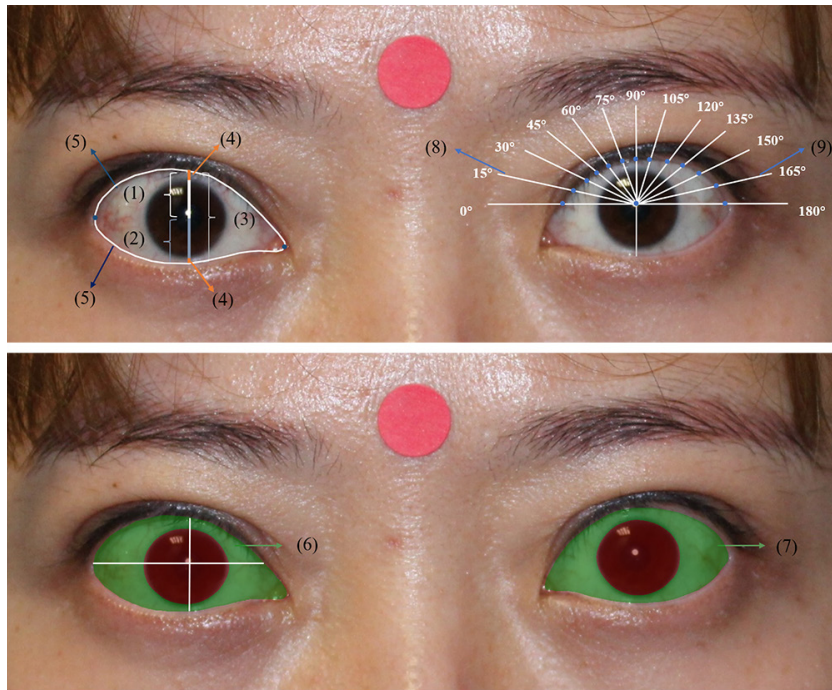

$$\begin{aligned}
 (1) \text{MRD1} &= \text{PN}_{\text{MRD1}} \times R \\
 (2) \text{MRD2} &= \text{PN}_{\text{MRD2}} \times R \\
 (3) \text{PF} &= \text{MRD1} + \text{MRD2} \\
 (4) \text{UER} / \text{LER} &= \text{PN}_{\text{UER} / \text{LER}} \times R \\
 (5) \text{UEL} / \text{LEL} &= \text{PN}_{\text{UEL} / \text{LEL}} \times R \\
 (6) \text{SN} / \text{ST} / \text{IN} / \text{IT} &= \text{PN}_{\text{SN} / \text{ST} / \text{IN} / \text{IT}} \times R^2 \\
 (7) \text{SA}_{\text{TOTAL}} &= \text{SN} + \text{ST} + \text{IN} + \text{IT} \\
 (8) \text{MPLD}_{\text{N}0/15/30/45/60/75} &= \text{PN}_{\text{N}0/15/30/45/60/75} \times R \\
 (9) \text{MPLD}_{\text{T}105/120/135/150/165/180} &= \text{PN}_{\text{T}105/120/135/150/165/180} \times R
 \end{aligned}$$

**Figure S1** Example image in which the measured pixel values were converted to the actual distances. This image has been published with the participant's consent. MRD, margin reflex distance; PF, palpebral fissure; UER, upper eyelid retraction; LER, lower eyelid retraction; UEL, upper eyelid length; LEL, lower eyelid length; SN, superior-nasal scleral area; ST, superior-temporal scleral area; IN, inferior-nasal scleral area; IT, inferior-temporal scleral area;  $\text{SA}_{\text{TOTAL}}$ , total scleral area; MPLD, mid-pupil lid distance; R, the millimeter: pixel ratio.

**Table S1** Performance of the eye detection model on 2 different datasets

| Parameters  | CelebFaces attributes dataset | Dataset consisting of 148 participants |
|-------------|-------------------------------|----------------------------------------|
| Recall      | 0.875                         | 0.887                                  |
| Specificity | 0.999                         | 0.992                                  |
| Accuracy    | 0.996                         | 0.985                                  |

**Table S2** The results of 4-fold cross-validation in 1862 participants

| Items  | Eyelid |       | Cornea |       |
|--------|--------|-------|--------|-------|
|        | Dice   | IoU   | Dice   | IoU   |
| Fold 1 | 0.936  | 0.884 | 0.946  | 0.900 |
| Fold 2 | 0.947  | 0.903 | 0.951  | 0.910 |
| Fold 3 | 0.946  | 0.901 | 0.951  | 0.910 |
| Fold 4 | 0.943  | 0.895 | 0.953  | 0.912 |
| Mean   | 0.943  | 0.896 | 0.950  | 0.908 |

IoU, Intersection over Union; Dice, dice coefficient.

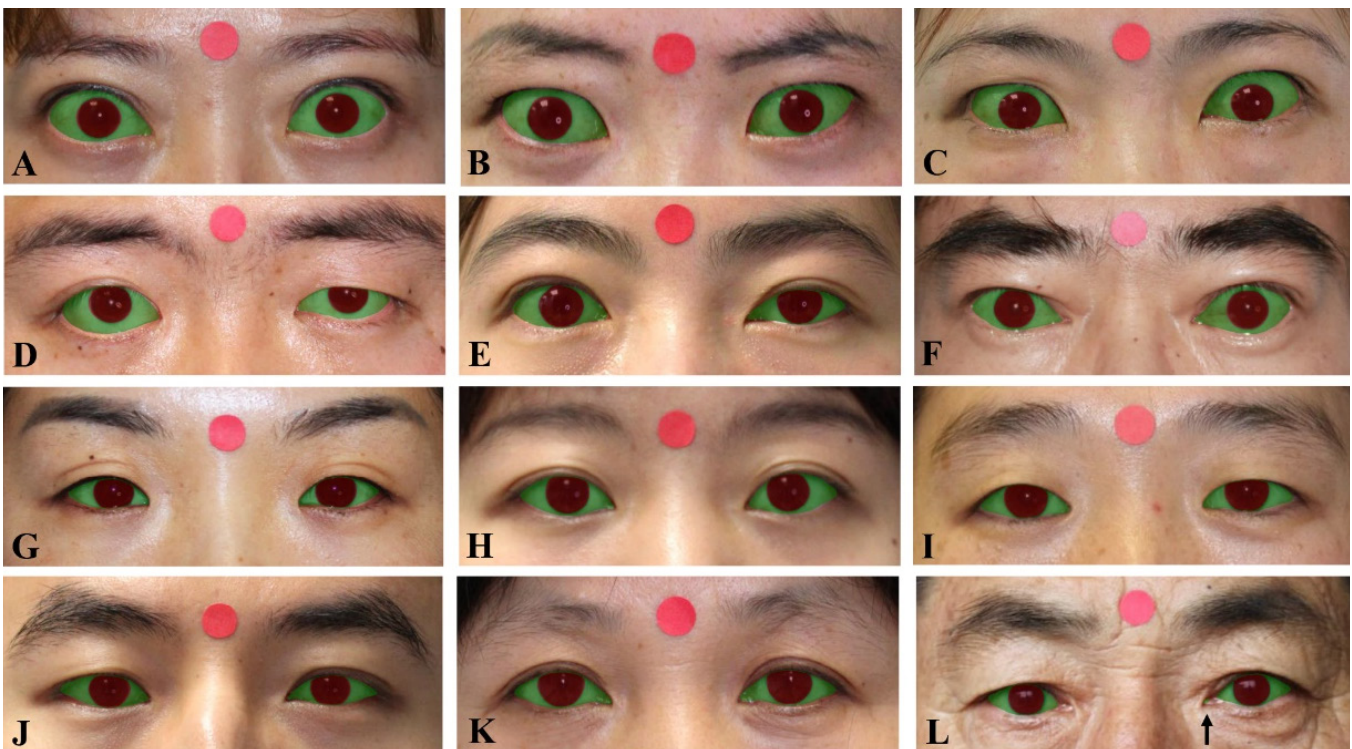

**Figure S2** Representative results of segmentation for the eyelid and cornea in patients with TAO and healthy participants. (A-F) Patients with TAO. (G-L) Healthy participants. The black arrow in the last image (L) shows the incomplete segmentation of the eyelid contour in the inner canthus. These images are published with the participants' consent. TAO, thyroid-associated ophthalmopathy.

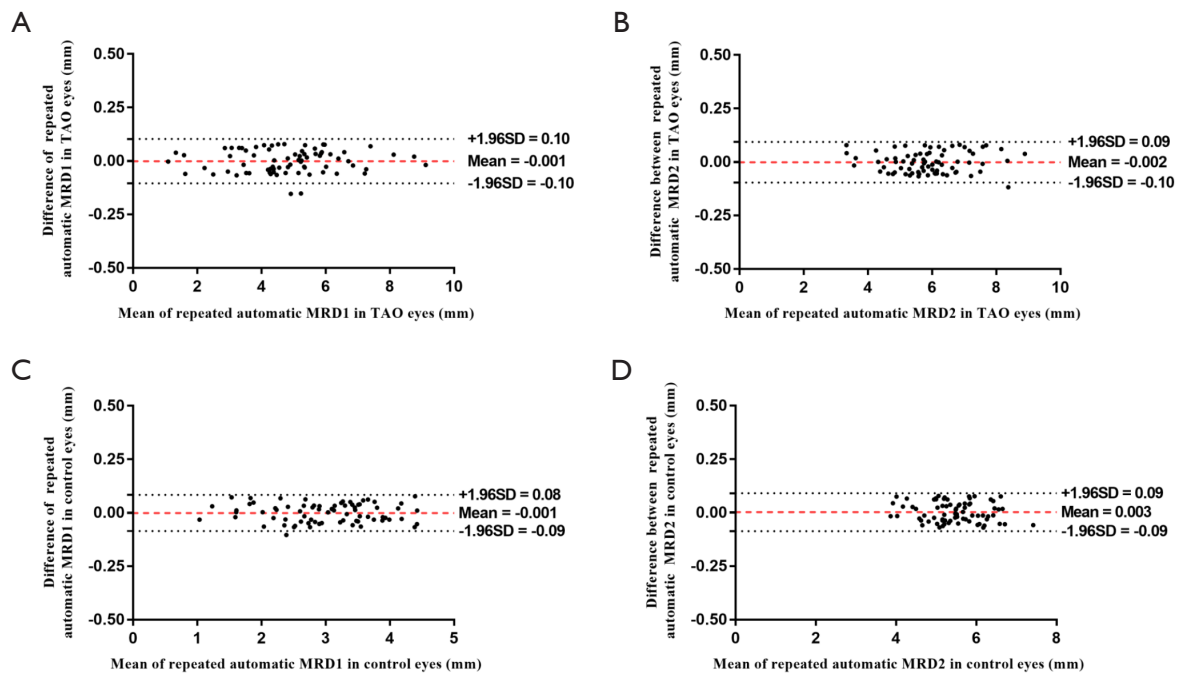

**Figure S3** The Bland-Altman plots of 2 repeated automatic MRDs in patients with TAO and control participants. TAO, thyroid-associated ophthalmopathy; MRD, margin reflex distance.
